# Supplementary material
Source: PubMed Central journal article supplement (PMC3620404)

# Supplemental Figure 1

Large

Small

C57BL/6

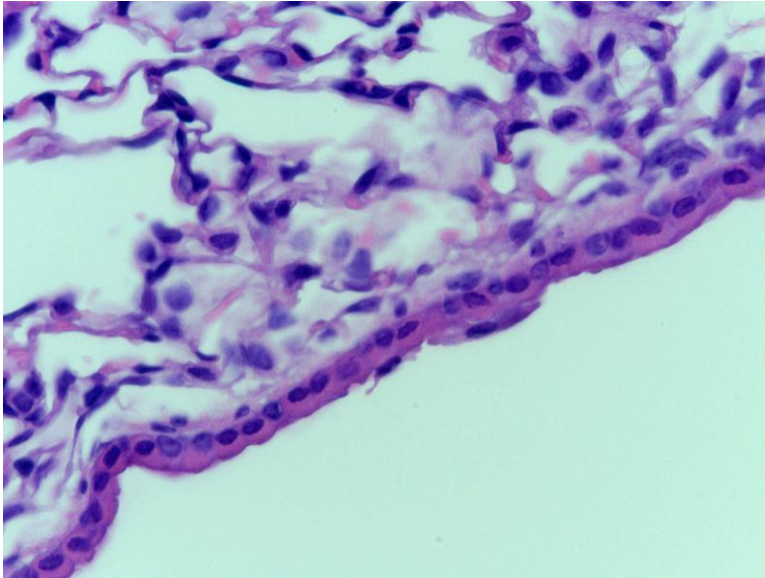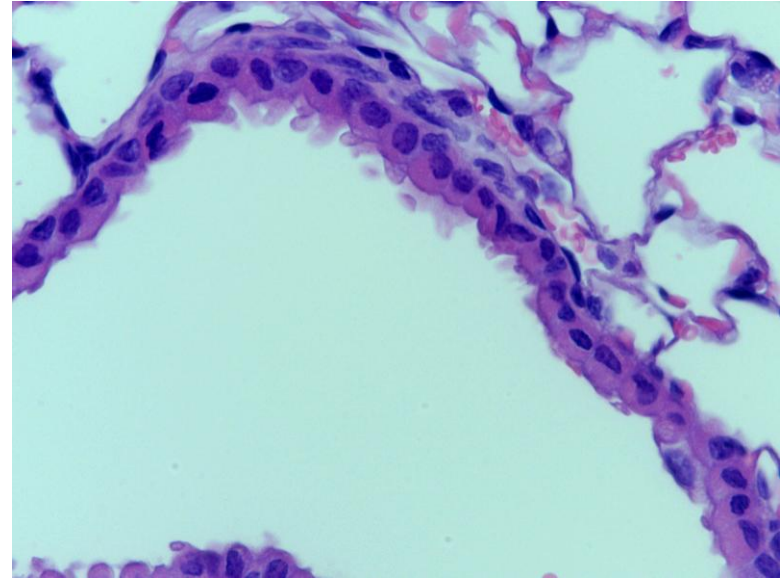

IL-22<sup>-/-</sup>

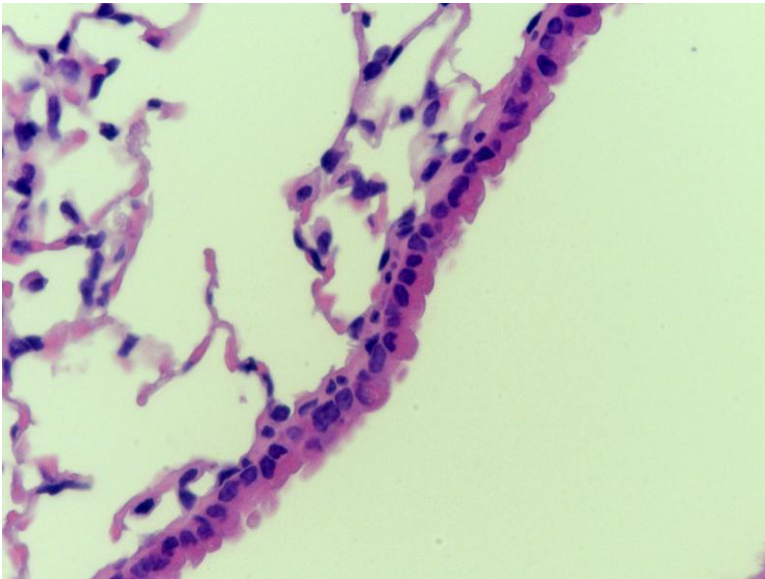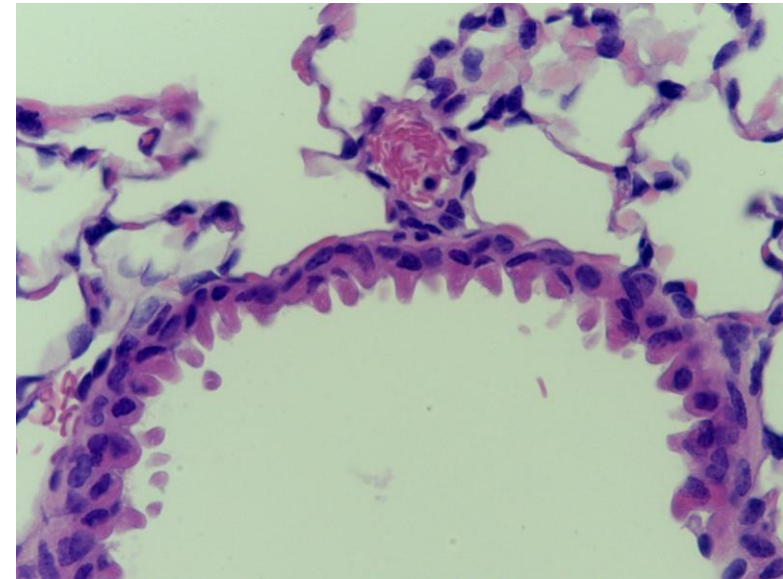

Supplement: mmc1.pdf [file mmc1.pdf]
